# Supplementary material for: Facet effects of palladium nanocrystals for oxygen reduction in ionic liquids and for sensing applications
Source: Royal Society of Chemistry journal article supplement (doi:10.1039/c5nr07502e), 2016-01-01
Supplement: c5nr07502e1.pdf [file c5nr07502e1.pdf]

## Electronic Supplementary Information (ESI)

### Facet Effects of Palladium Nanocrystals for Oxygen Reduction in an Ionic Liquid and Sensing Applications

Yongan Tang,<sup>a</sup> Xiaowei Chi,<sup>a</sup> Shouzhong Zou,<sup>b</sup> and Xiangqun Zeng<sup>\*a</sup>

<sup>a</sup>Department of Chemistry, Oakland University, Rochester, Michigan 48309, United States

<sup>b</sup>Department of Chemistry, American University, Washington, DC 20016, United States

[\\*Address correspondence to zeng@oakland.edu](mailto:zeng@oakland.edu)

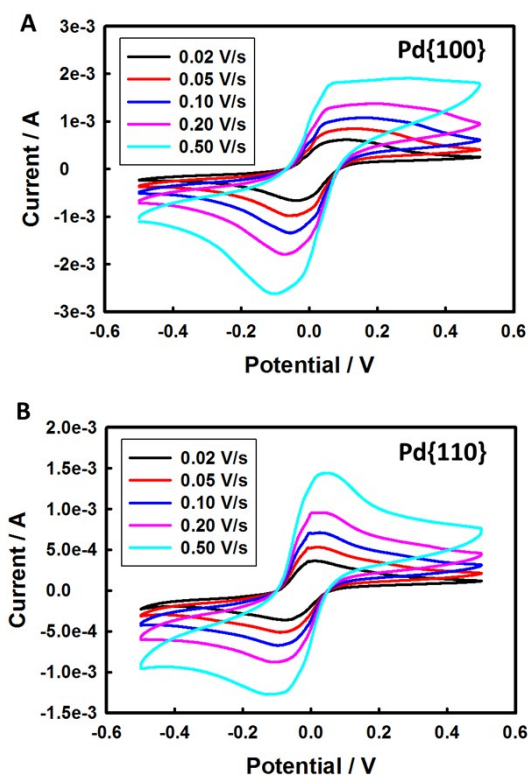

**Figure S1.** Cyclic voltammograms at different scan rate of (A) cubic palladium nanocrystals (B) RD palladium nanocrystals in [Bmpy][NTf<sub>2</sub>] with 0.01 M ferrocene (third cycle). Based on Randles-Sevcik equation ( $I_p = 268600n^{3/2}AD^{1/2}Cv^{1/2}$ ), the redox reaction of ferrocene/ferrocenium can be used for obtaining the relationship between peak current and surface area. The electrochemically active areas (ECAs) for Pd{100} and Pd{110} are 32.49 cm<sup>2</sup> and 37.49 cm<sup>2</sup>, respectively.

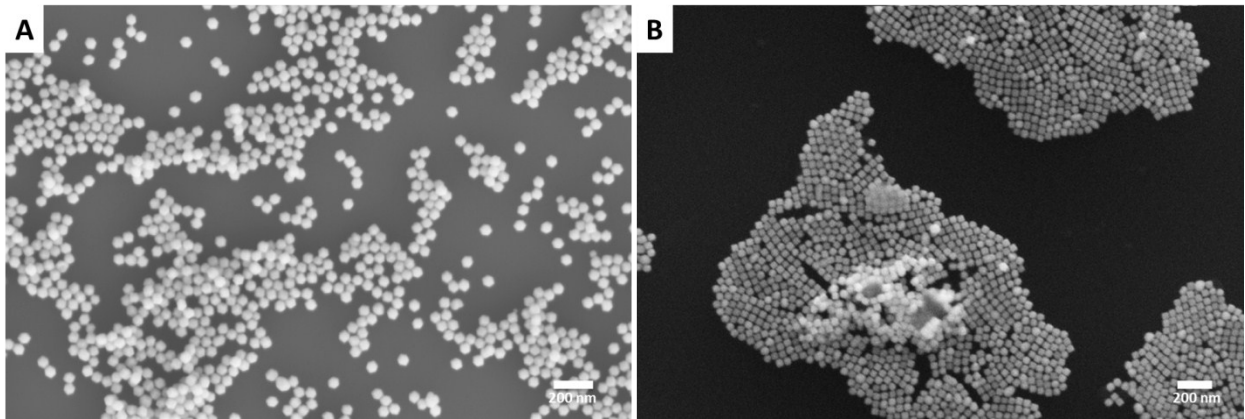

**Figure S2.** SEM images of (A) RD, (B) Cubic Pd nanocrystals after 300 °C annealing, the unchanged morphology confirmed their unchanged facet of  $\{110\}$  and  $\{100\}$  for RD and cubic Pd nanocrystal, respectively.

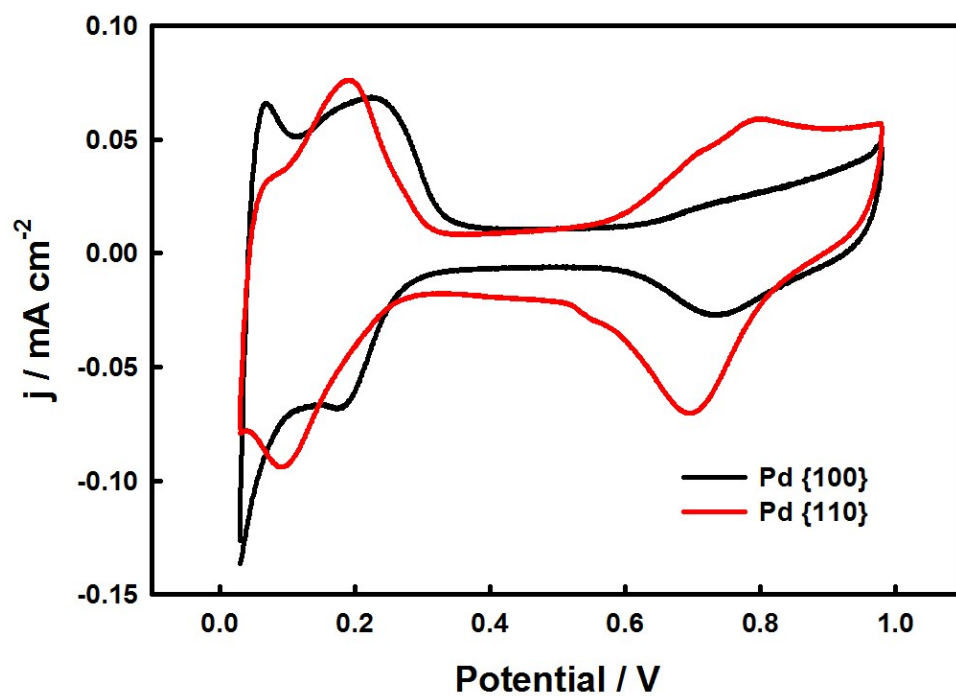

**Figure S3.** Cyclic voltammograms of palladium nanocrystal electrodes in 0.1 M  $\text{HClO}_4$  solution after annealing treatment (third cycle), scan rate: 100 mV/s (potential vs. RHE).

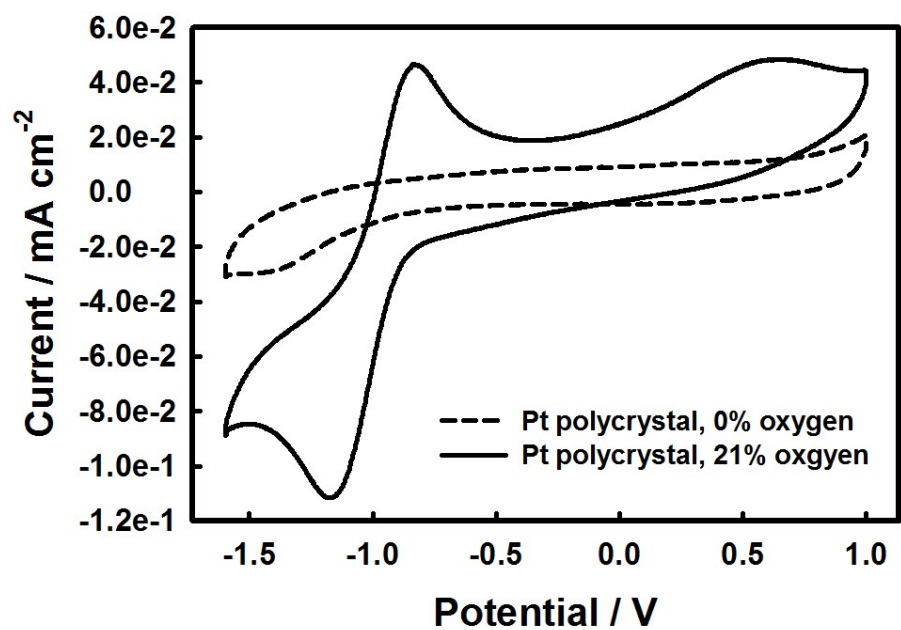

**Figure S4.** Cyclic voltammograms of polycrystalline platinum electrodes in (solid) 21% v/v oxygen concentration, (dash) pure nitrogen (third cycle). Scan rate: 0.1 V/s.

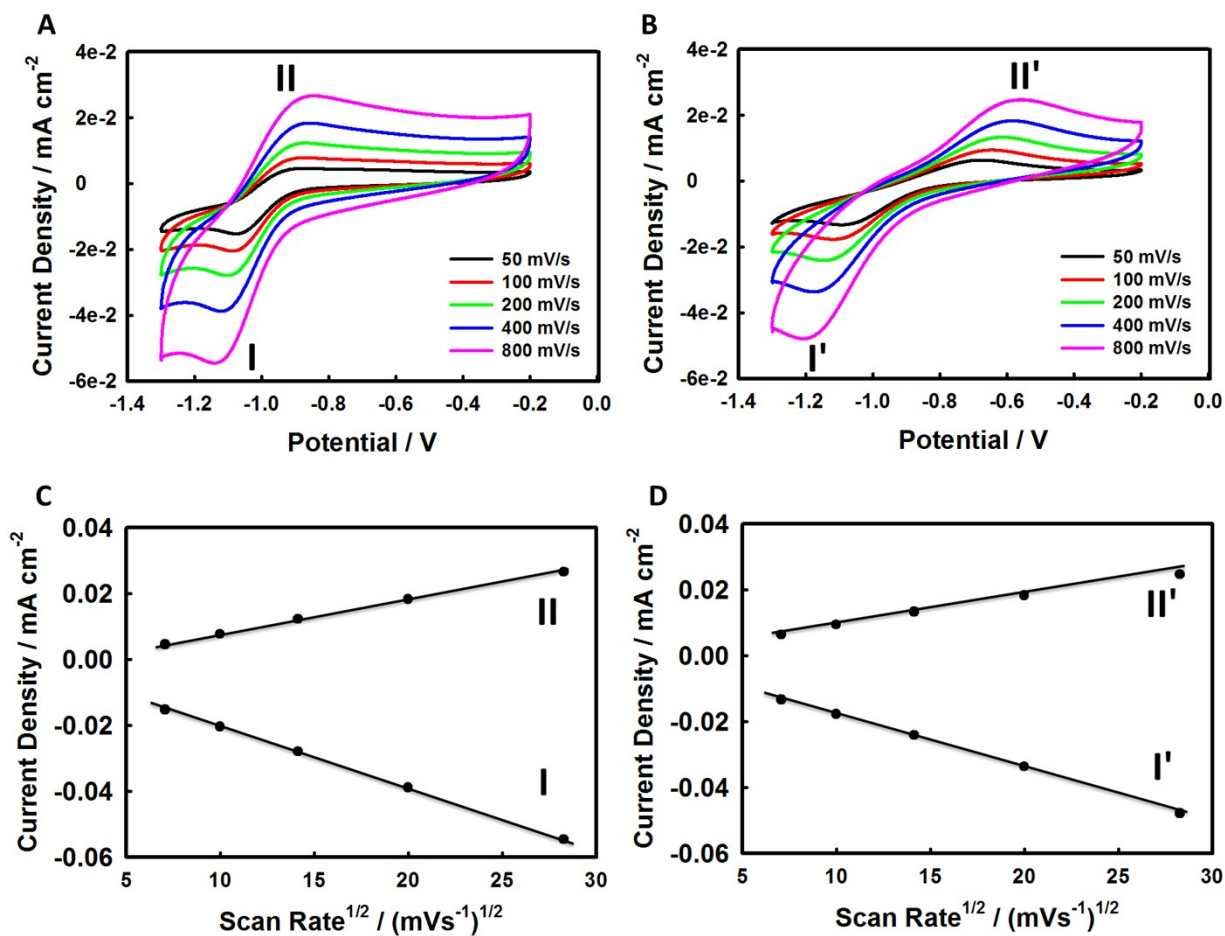

**Figure S5.** Different scan rates of cyclic voltammograms for (A) cubic (B) RD Pd nanocrystals in [Bmpy][NTf<sub>2</sub>] at (10%, v/v) oxygen. Peak current vs. square root of scan rate plots for (C) cubic (D) RD Pd nanocrystal.

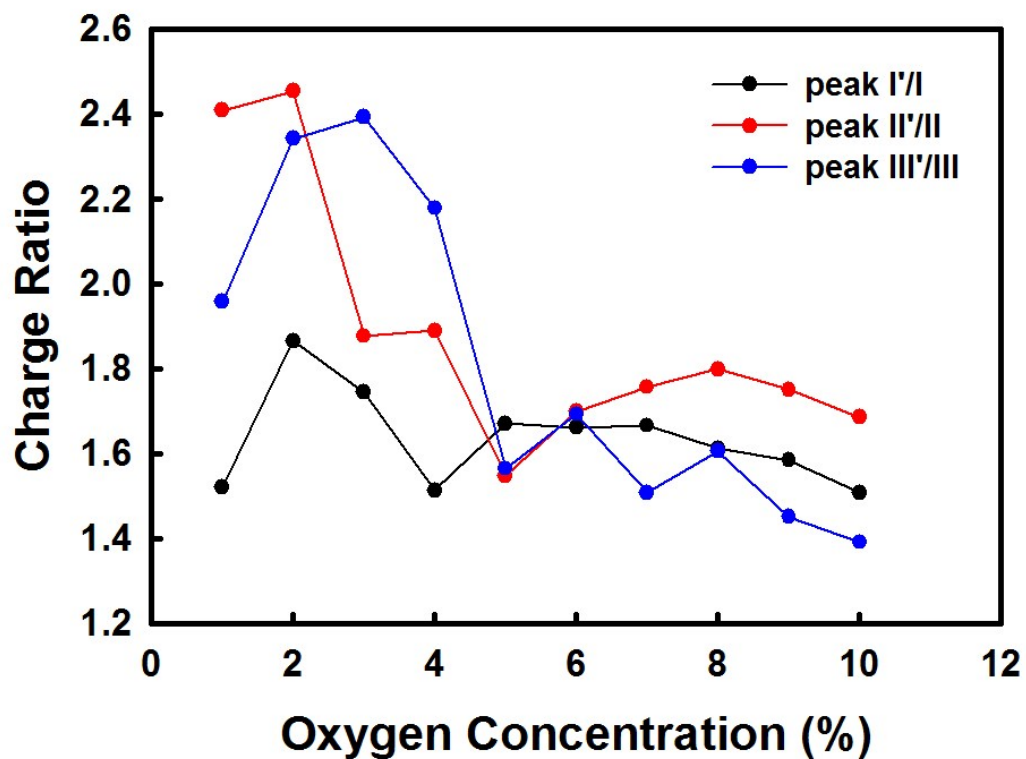

**Figure S6.** Charge ratio of oxygen redox peaks for two types of palladium nanocrystals in [Bmpy][NTf<sub>2</sub>] obtained in Figure 2A and 2B.

**Table S1.** The names and structures of ionic liquid and possible deprotonated cation structures

|                                       |  |                                       |  |
|---------------------------------------|--|---------------------------------------|--|
| [NTf <sub>2</sub> ] <sup>-</sup>      |  | [Bmpy] <sup>+</sup>                   |  |
| [Bmpy] <sub>de</sub> <sup>+</sup> (1) |  | [Bmpy] <sub>de</sub> <sup>+</sup> (2) |  |
